# Supplementary material
Source: Research Square preprint supplement (doi:10.21203/rs.3.rs-9067186/v1)
Supplement: Supplementary file 1 [file 4f3580fe1c09026722478fce.docx]

Tissue ATF


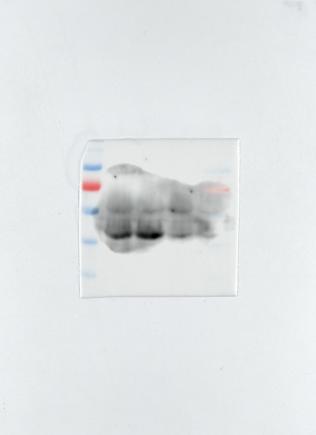

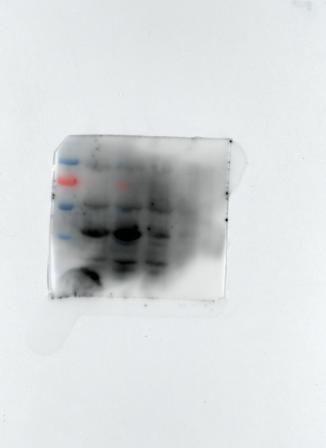

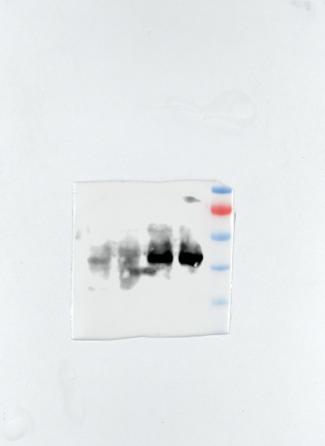


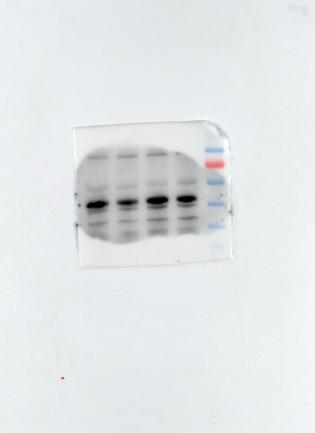

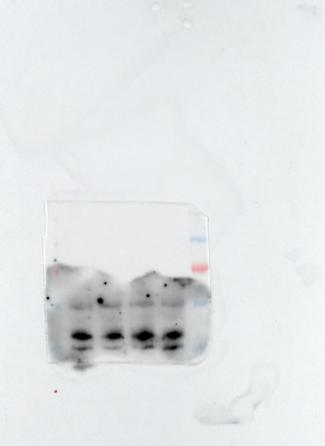

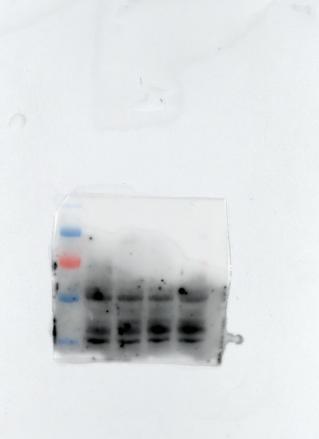


BDNF


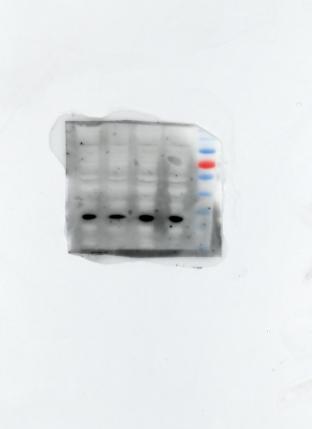

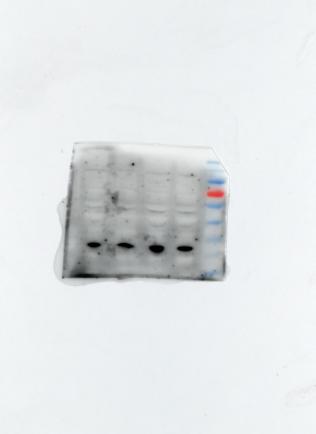

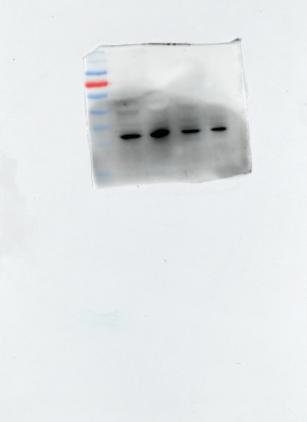


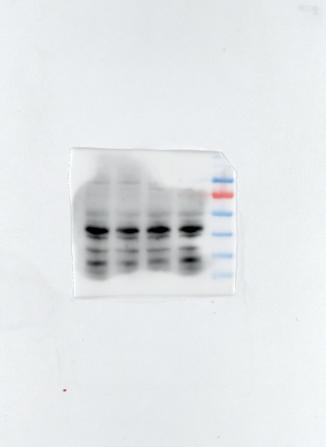

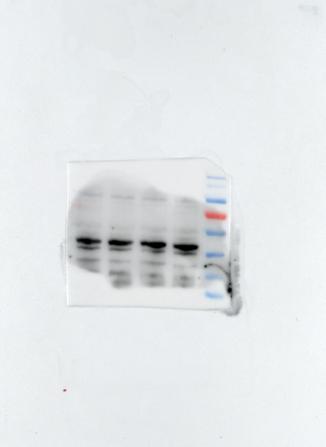

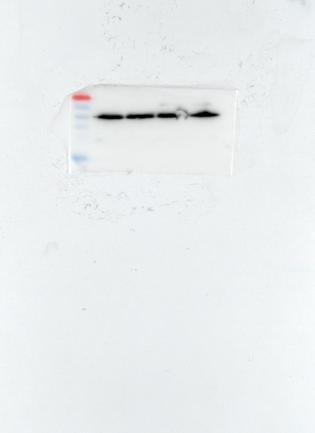


BIP


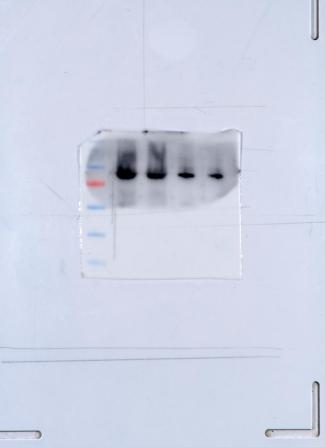

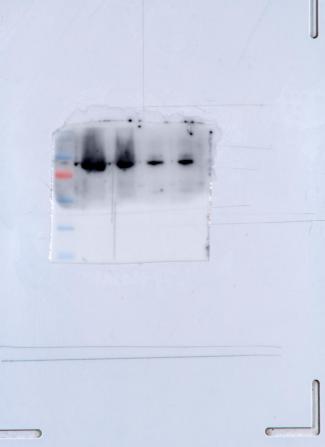

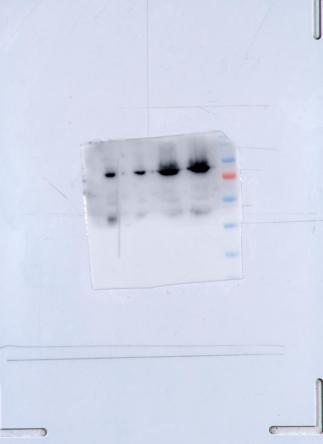


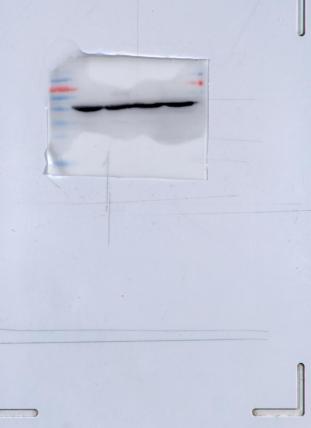

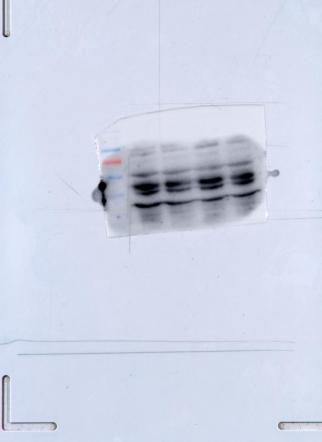

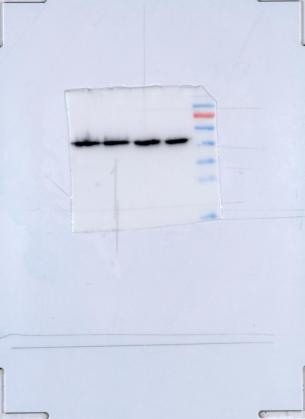


Cal


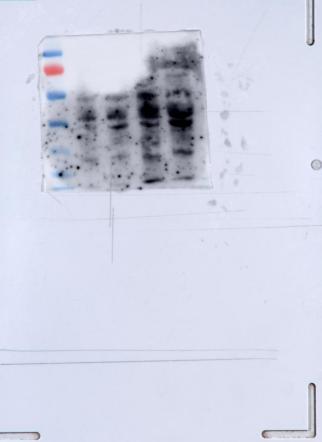

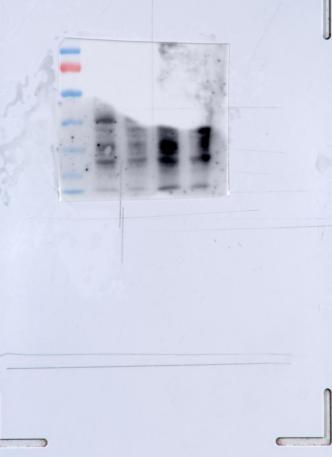

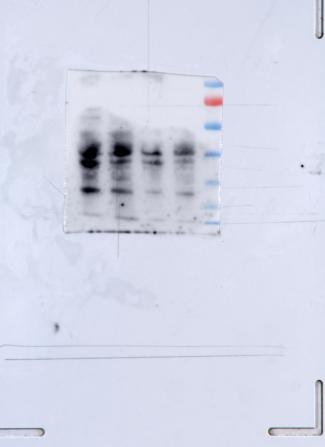


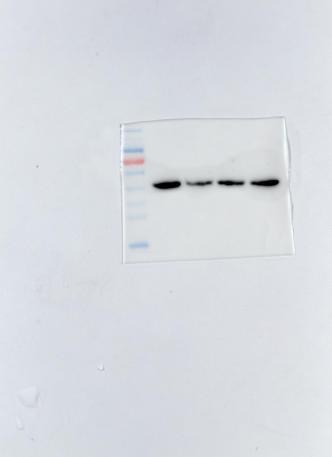

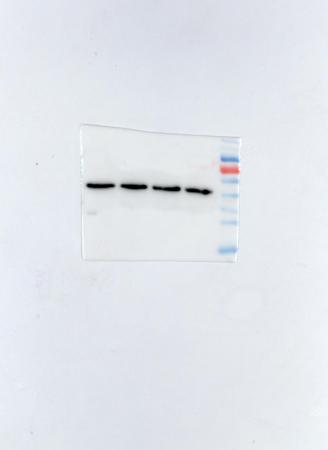

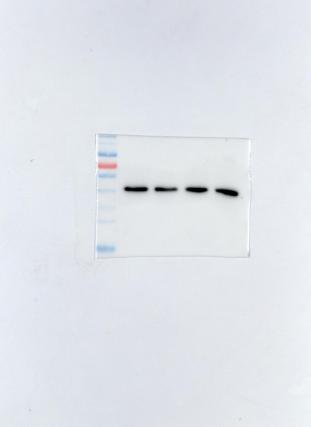


CHOP


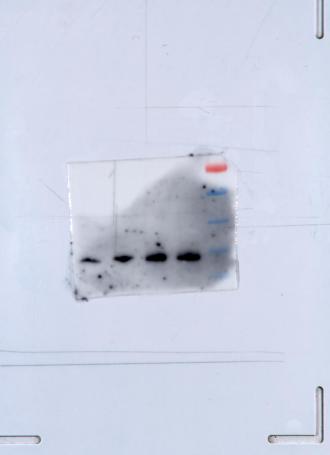

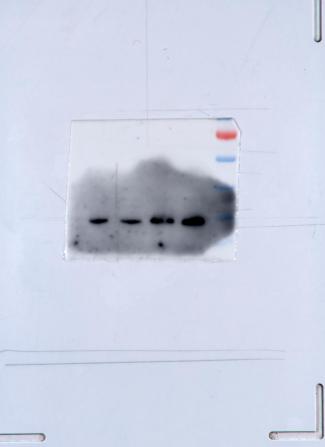

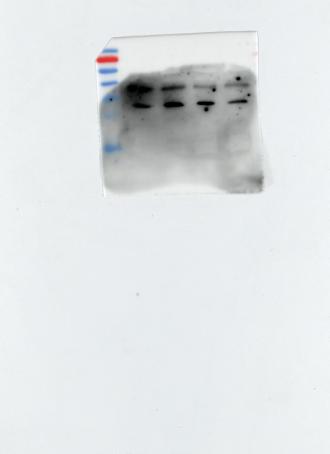


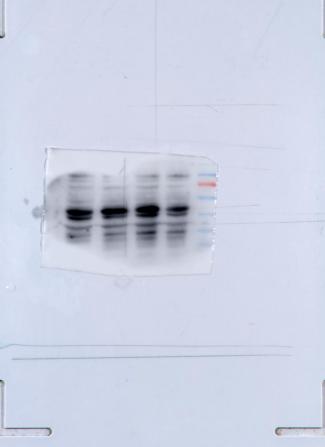

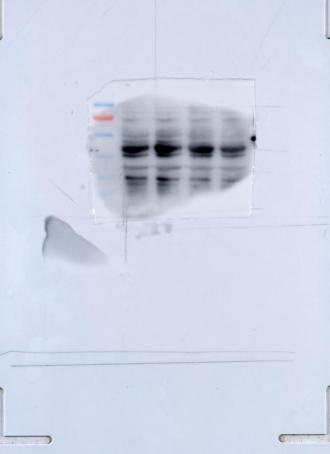

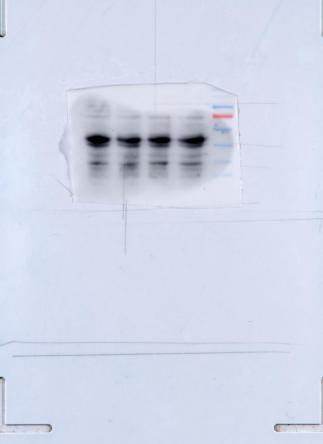


DCX


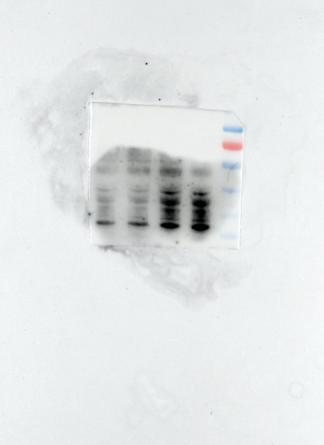

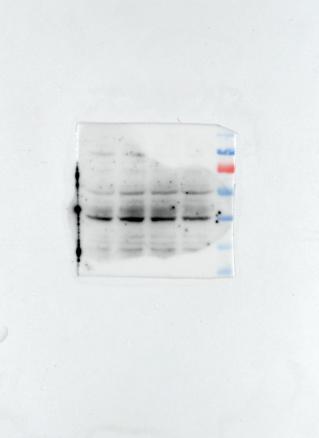

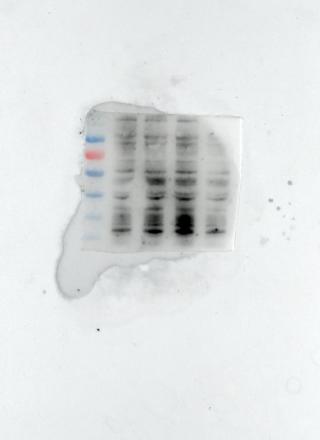


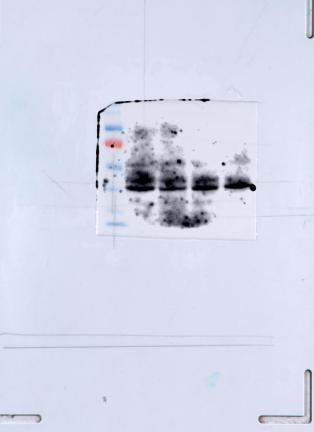

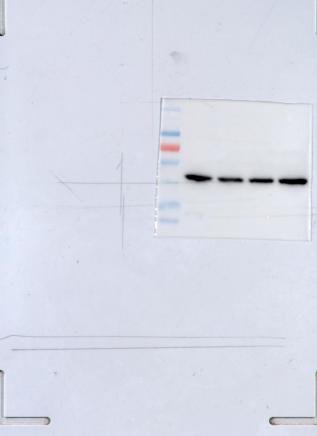

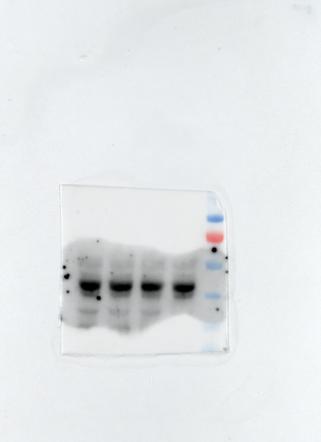


GFAP


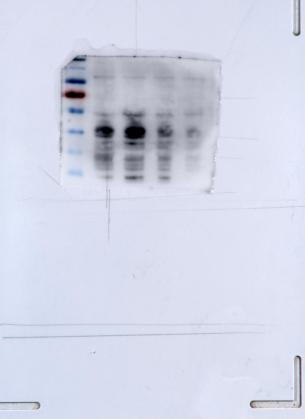

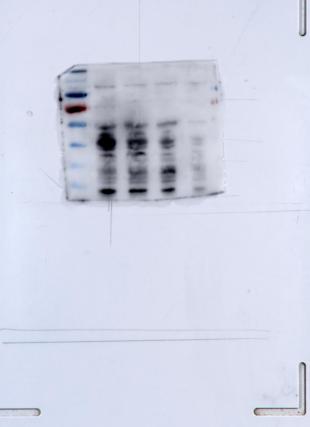

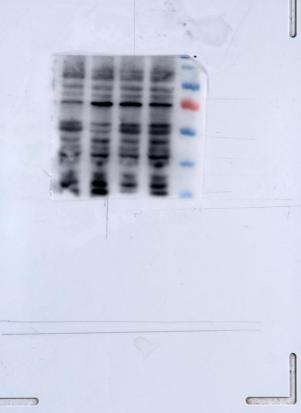

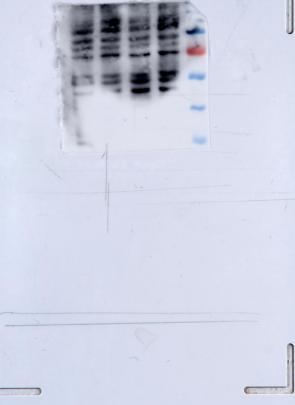


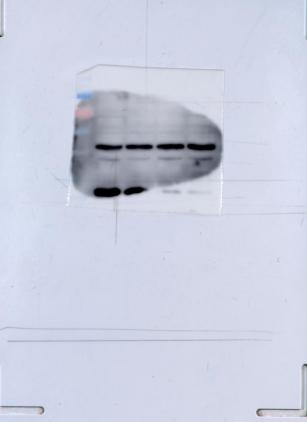

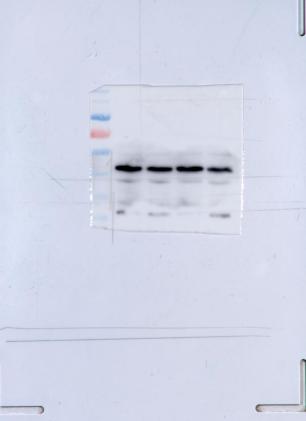

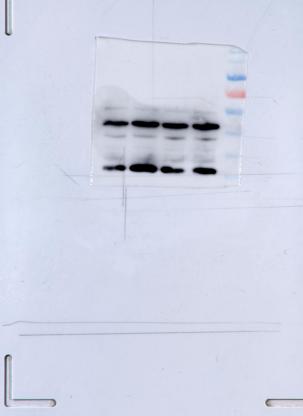

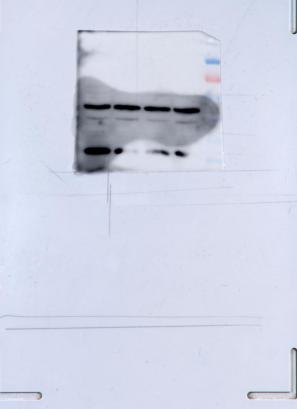


Glut1


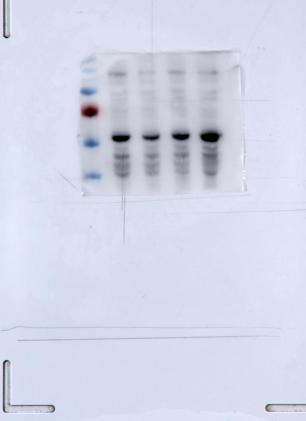

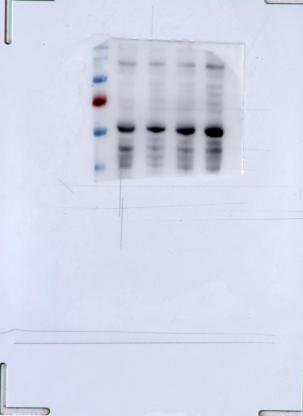

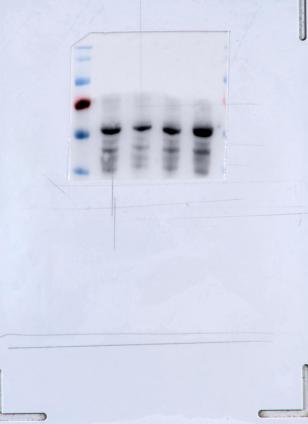


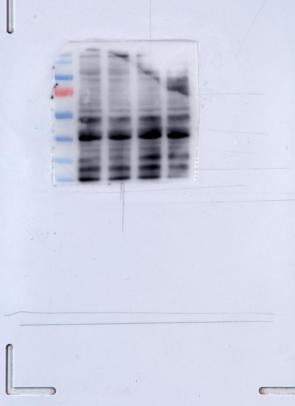

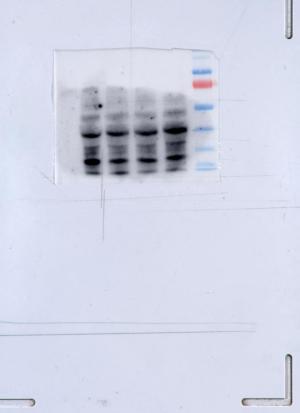

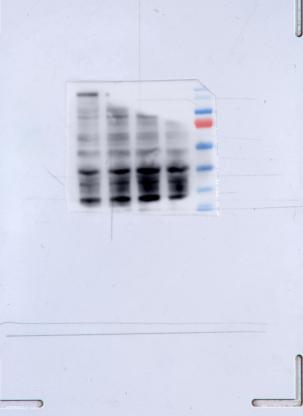


GRP94


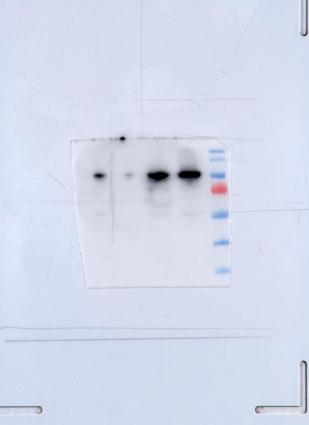

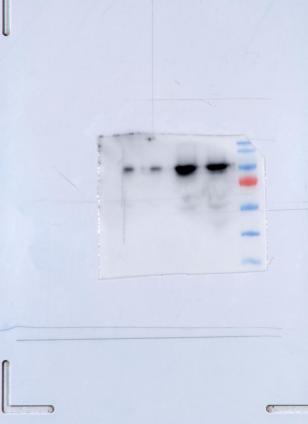

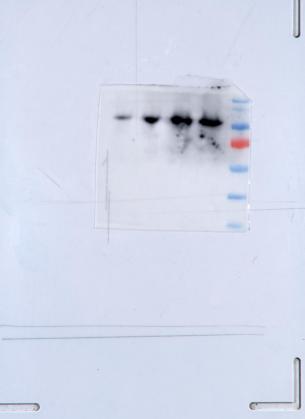


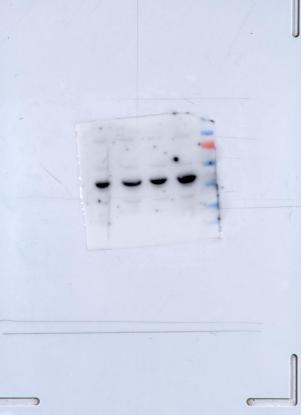

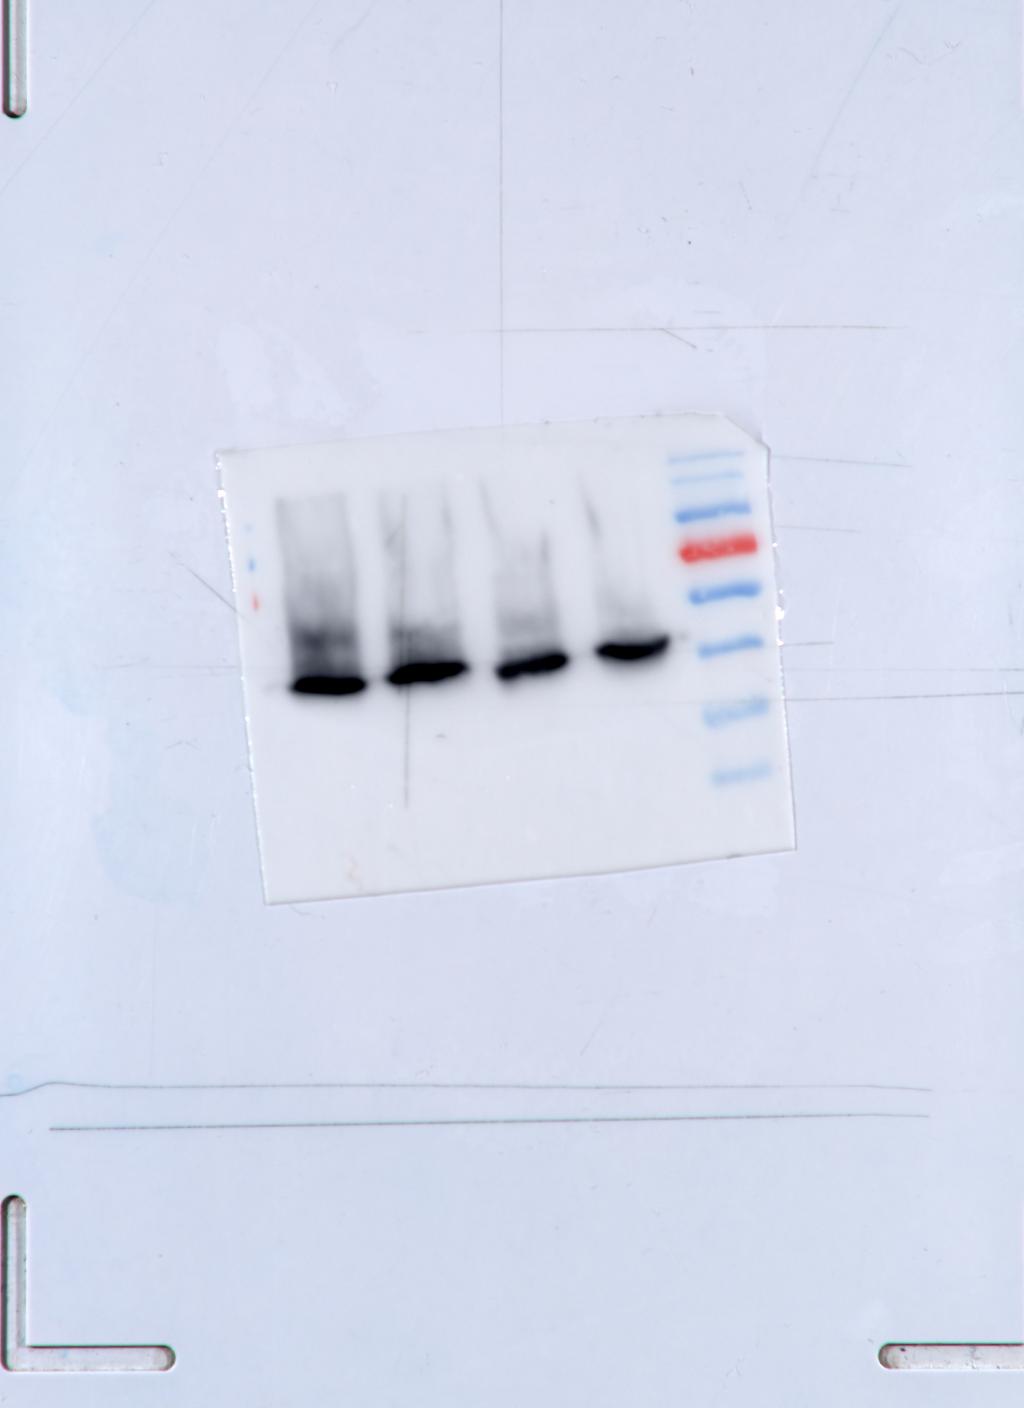

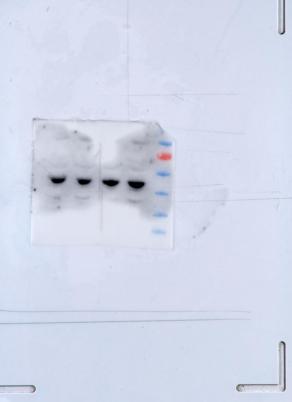


HSP90AB1


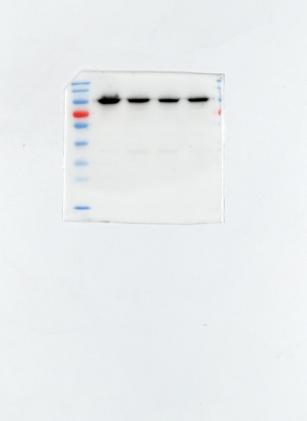

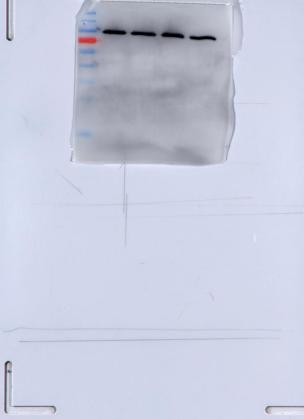

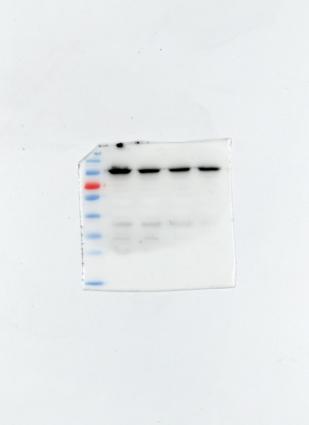


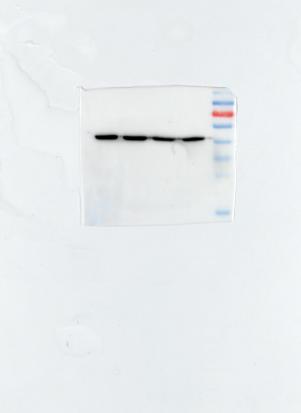

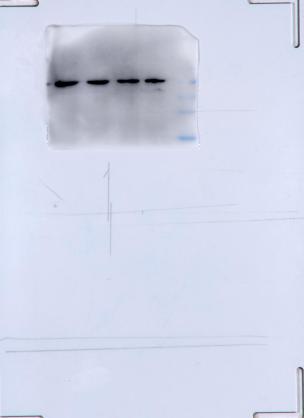

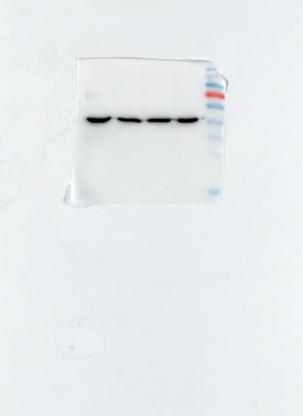


HSP90a


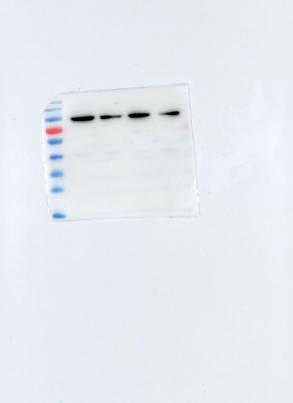

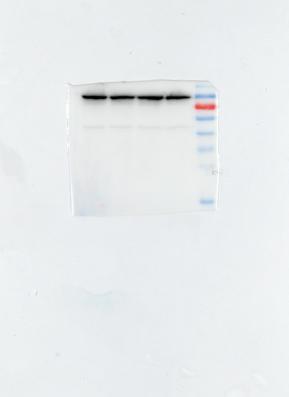

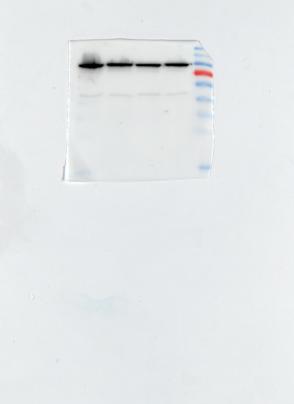


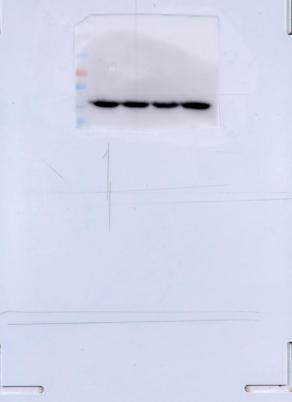

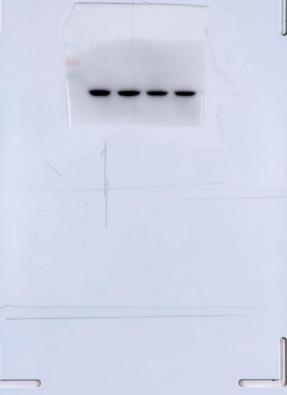

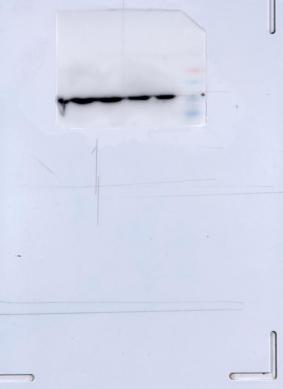


MCU


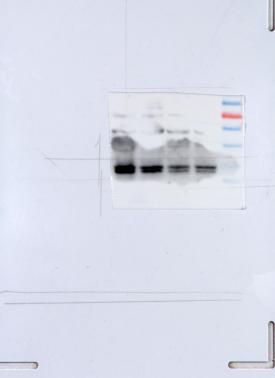

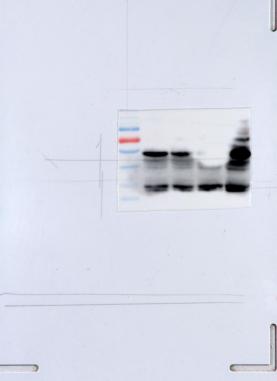

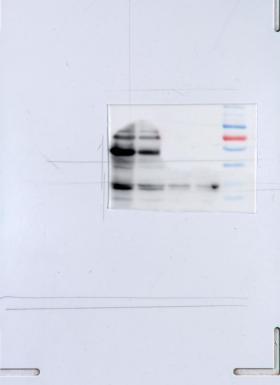


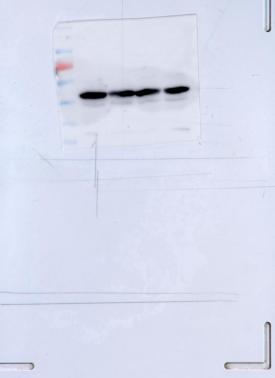

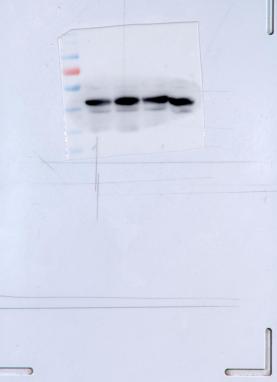

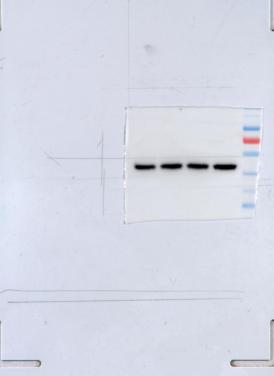


MICU1


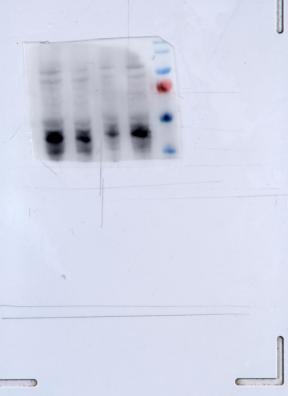

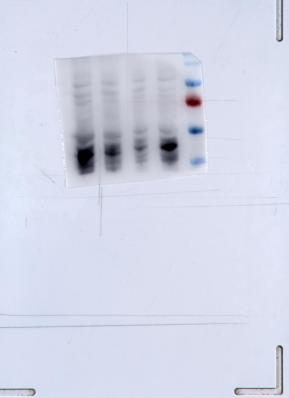

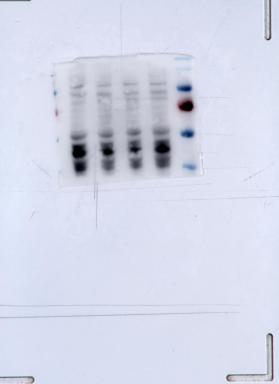

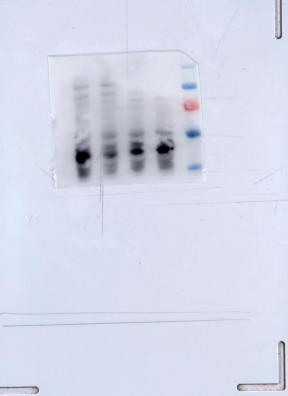


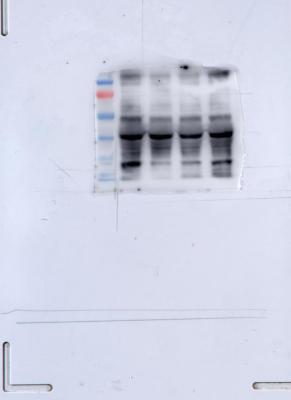

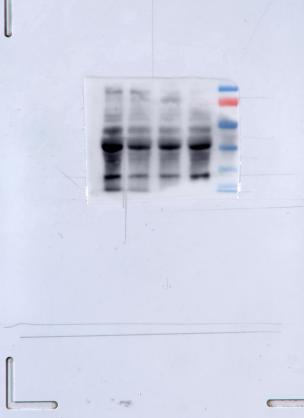

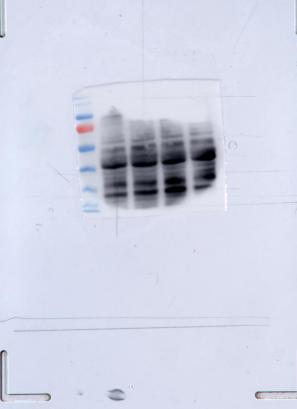

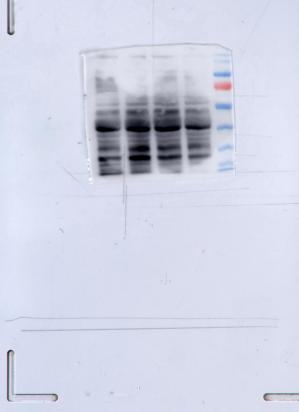


ND1


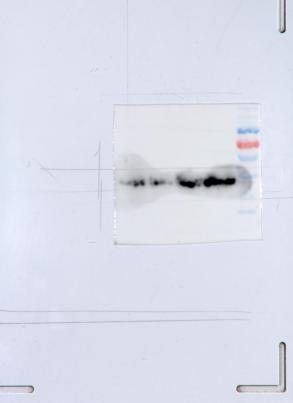

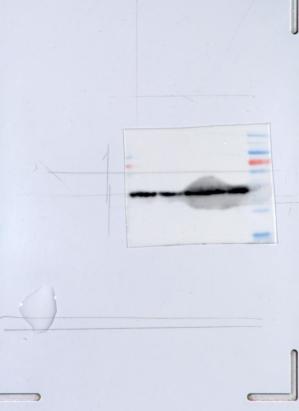

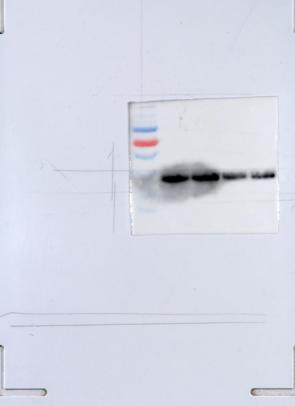


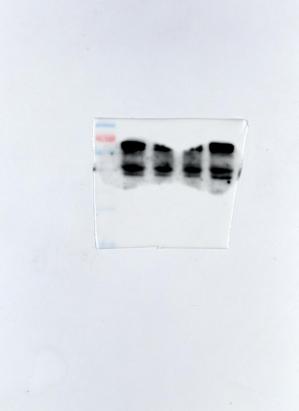

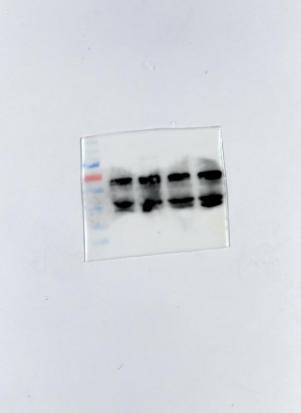

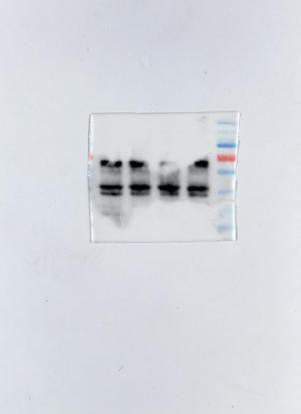


NGF


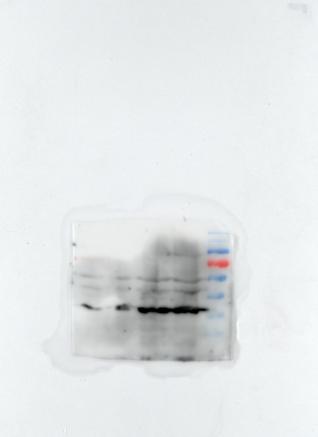

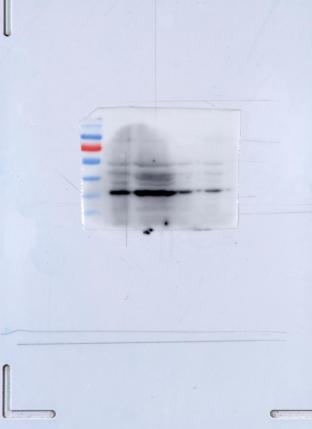

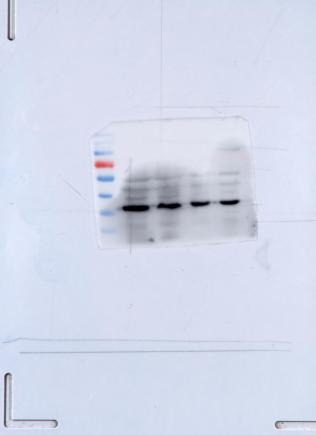


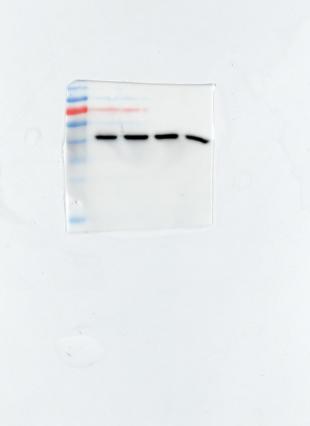

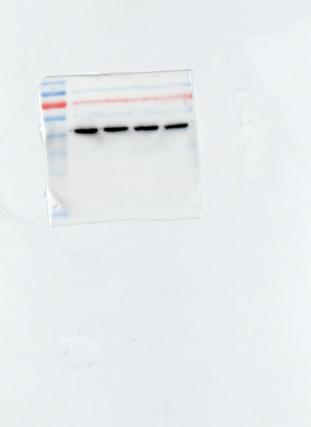

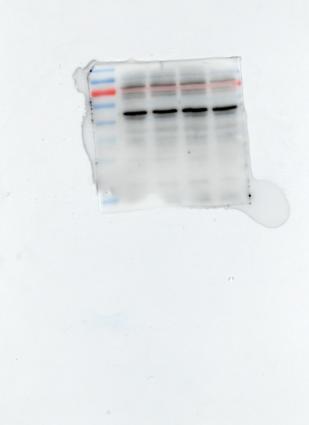


POLGB2


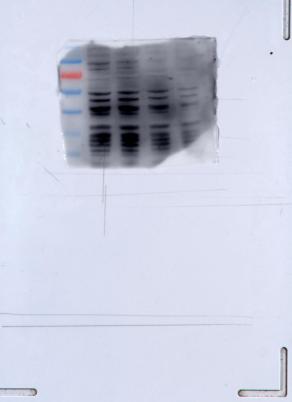

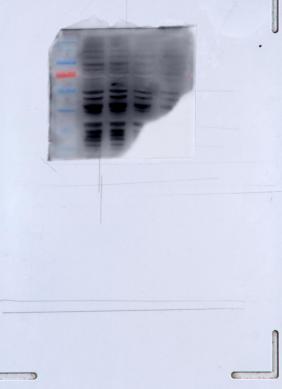

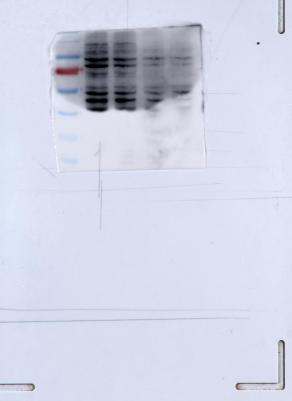

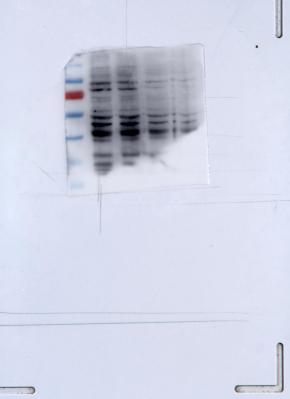


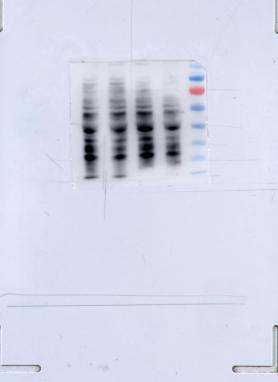

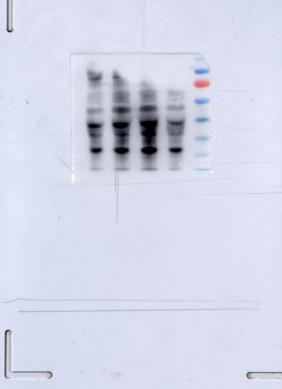


PSD95

SATB1

SSBP1

SYN

Wnt5a

TRAP1

cell Syn

ATF6

BDNF

BIP

Cal

CHOP

DCX

GFAP

GRP94

MCU

MICU1

ND1

NGF

POLGB2

PSD95

SATB1

SSBP1

TFAM

TOmm20

TRAP1

WNT5a

Cell overexpression syn

ATF6

BDNF

BIP

Cal

CHOP

DCX

GFAP

MCU

MICU1

ND1

POLGB2

PSD95

SATB1

SSBP1

TOMM20

TRAP1

WNT5A

Cell knockdown syn

ATF6

BDNF

BIP

CHOP

DCX

GFAP

GRP94

MCU

MICU1

ND1

NGF

POLGB2

PSD95

SATB1

SSBP1

TFAM

TOMM20

TRAP1

WNT5A

CHHA 3组 BDNF

DCX

DRP1

MCU

MICU1

SATB1

TFAM

TRAP1

WNT5A
